# Supplementary material for: Oral health assessment of older adults living in long-term care facilities by non-dental professionals: a systematic review protocol of instruments
Source: HighWire-hosted journal article supplement (doi:10.1136/bmjopen-2021-050289), 2021-08-01
Supplement: bmjopen-2021-050289supp001_data_supplement.pdf [file bmjopen-2021-050289supp001_data_supplement.pdf]

## Supplemental material

| Search | Query                                                                                                                                                                                                                                                                                                                                                                                                                                                                                                                                                                                                                                                                                                                                                                                                                                                                                                                                                                                                                                                                                                                                                                                                                                                                                                                                                                                                                                                                                                                                                                                                                                                                                                                                                                                                                                                                                                                                                                                                                                                            | Results   |
|--------|------------------------------------------------------------------------------------------------------------------------------------------------------------------------------------------------------------------------------------------------------------------------------------------------------------------------------------------------------------------------------------------------------------------------------------------------------------------------------------------------------------------------------------------------------------------------------------------------------------------------------------------------------------------------------------------------------------------------------------------------------------------------------------------------------------------------------------------------------------------------------------------------------------------------------------------------------------------------------------------------------------------------------------------------------------------------------------------------------------------------------------------------------------------------------------------------------------------------------------------------------------------------------------------------------------------------------------------------------------------------------------------------------------------------------------------------------------------------------------------------------------------------------------------------------------------------------------------------------------------------------------------------------------------------------------------------------------------------------------------------------------------------------------------------------------------------------------------------------------------------------------------------------------------------------------------------------------------------------------------------------------------------------------------------------------------|-----------|
| #1     | <p>""Oral Health""[Mesh] OR ""Geriatric Dentistry""[Mesh] OR ""Dental Care""[Mesh] OR ""Dental Care for Aged""[Mesh] OR ""Dentistry""[Mesh] OR ""Dentists""[Mesh] OR dental*[ti] OR dentist*[ti] OR oral hygien*[ti] OR dental*[ot] OR dentist*[ot] OR oral hygien*[ot]",,Publication Date,, ""Oral Health""[MeSH Terms] OR ""Geriatric Dentistry""[MeSH Terms] OR ""Dental Care""[MeSH Terms] OR ""Dental Care for Aged""[MeSH Terms] OR ""Dentistry""[MeSH Terms] OR ""Dentists""[MeSH Terms] OR dental*""[Title] OR dentist*""[Title] OR oral hygien*""[Title] OR dental*""[Other Term] OR dentist*""[Other Term] OR oral hygien*""[Other Term]"</p>                                                                                                                                                                                                                                                                                                                                                                                                                                                                                                                                                                                                                                                                                                                                                                                                                                                                                                                                                                                                                                                                                                                                                                                                                                                                                                                                                                                                          | 499,813   |
| #2     | <p>""Aged""[Mesh] OR ""Aged, 80 and over""[Mesh] OR ""Frail Elderly""[Mesh] OR ""Geriatrics""[Mesh] OR ""Geriatric Psychiatry""[Mesh] OR ""Geriatric Nursing""[Mesh] OR ""Geriatric Dentistry""[Mesh] OR ""Dental Care for Aged""[Mesh] OR ""Health Services for the Aged""[Mesh] OR (elder*[tw] OR eldest[tw] OR frail*[tw] OR geriatri*[tw] OR old age*[tw] OR oldest old*[tw] OR senior*[tw] OR senium[tw] OR very old*[tw] OR septuagenarian*[tw] OR octagenarian*[tw] OR octogenarian*[tw] OR nonagenarian*[tw] OR centarian*[tw] OR centenarian*[tw] OR supercentenarian*[tw] OR older people[tw] OR older subject*[tw] OR older patient*[tw] OR older age*[tw] OR older adult*[tw] OR older man[tw] OR older men[tw] OR older male*[tw] OR older woman[tw] OR older women[tw] OR older female*[tw] OR older population*[tw] OR older person*[tw]),,Publication Date,, ""Aged""[MeSH Terms] OR ""aged, 80 and over""[MeSH Terms] OR ""Frail Elderly""[MeSH Terms] OR ""Geriatrics""[MeSH Terms] OR ""Geriatric Psychiatry""[MeSH Terms] OR ""Geriatric Nursing""[MeSH Terms] OR ""Geriatric Dentistry""[MeSH Terms] OR ""Dental Care for Aged""[MeSH Terms] OR ""Health Services for the Aged""[MeSH Terms] OR elder*""[Text Word] OR eldest""[Text Word] OR frail*""[Text Word] OR geriatri*""[Text Word] OR old age*""[Text Word] OR oldest old*""[Text Word] OR senior*""[Text Word] OR senium""[Text Word] OR very old*""[Text Word] OR septuagenarian*""[Text Word] OR octagenarian*""[Text Word] OR octogenarian*""[Text Word] OR nonagenarian*""[Text Word] OR centarian*""[Text Word] OR centenarian*""[Text Word] OR supercentenarian*""[Text Word] OR older people""[Text Word] OR older subject*""[Text Word] OR older patient*""[Text Word] OR older age*""[Text Word] OR older adult*""[Text Word] OR older man""[Text Word] OR older men""[Text Word] OR older male*""[Text Word] OR older woman""[Text Word] OR older women""[Text Word] OR older female*""[Text Word] OR older population*""[Text Word] OR older person*""[Text Word]"</p> | 3,421,849 |
| #3     | <p>""nursing homes""[Mesh] OR ""long term care""[Mesh] OR ""residential care"" OR ""homes for the aged""[Mesh] OR ""residential facilities""[Mesh] OR ""long-term care institution"" OR ""residential aged care"" OR ""skilled nursing facilities""[Mesh] OR ""nursing facility"" OR ""care worker"" OR ""nurses aids"" OR ""nursing personnel"" OR ""Caregivers""[Mesh] OR ""Nursing""[Mesh] OR ""nursing"" [Subheading] OR ""Nursing Care""[Mesh] OR ""Nurses""[Mesh] OR ""Nursing Staff""[Mesh] OR ""Nursing Care""[Mesh] OR ""Nurse's Role""[Mesh] OR ""Home Health Aides""[Mesh] OR ""Nursing Assistants""[Mesh] OR ""Licensed Practical Nurses""[Mesh] OR ""Home Care Services""[Mesh] OR nurs*""[tiab] OR home care""[tiab] OR home healthcare""[tiab] OR home health care""[tiab] OR care aide*""[tiab] OR home health aide*""[tiab]",,Publication Date,, ""nursing homes""[MeSH Terms] OR ""long term care""[MeSH Terms] OR ""residential care""[All Fields] OR ""homes for the aged""[MeSH Terms] OR ""residential facilities""[MeSH Terms] OR ""long-term care institution""[All Fields] OR ""residential aged care""[All Fields] OR ""skilled nursing facilities""[MeSH</p>                                                                                                                                                                                                                                                                                                                                                                                                                                                                                                                                                                                                                                                                                                                                                                                                                                                                          | 802,910   |

|    |                                                                                                                                                                                                                                                                                                                                                                                                                                                                                                                                                                                                                                                                                                                                                                                                                                                                                                                                                                                                                                                                                                                                                                                                                                                                                                                                                                                                                                                                                                                                                                                                                                                                                                                                                                                                                                                                                                                                                                                                                                                                                                                                                                                                                                                                                                                                                                                                                                                                                                                                                                                                                                                                                                                                                                                                          |           |
|----|----------------------------------------------------------------------------------------------------------------------------------------------------------------------------------------------------------------------------------------------------------------------------------------------------------------------------------------------------------------------------------------------------------------------------------------------------------------------------------------------------------------------------------------------------------------------------------------------------------------------------------------------------------------------------------------------------------------------------------------------------------------------------------------------------------------------------------------------------------------------------------------------------------------------------------------------------------------------------------------------------------------------------------------------------------------------------------------------------------------------------------------------------------------------------------------------------------------------------------------------------------------------------------------------------------------------------------------------------------------------------------------------------------------------------------------------------------------------------------------------------------------------------------------------------------------------------------------------------------------------------------------------------------------------------------------------------------------------------------------------------------------------------------------------------------------------------------------------------------------------------------------------------------------------------------------------------------------------------------------------------------------------------------------------------------------------------------------------------------------------------------------------------------------------------------------------------------------------------------------------------------------------------------------------------------------------------------------------------------------------------------------------------------------------------------------------------------------------------------------------------------------------------------------------------------------------------------------------------------------------------------------------------------------------------------------------------------------------------------------------------------------------------------------------------------|-----------|
|    | Terms] OR ""nursing facility""[All Fields] OR ""care worker""[All Fields] OR ""nurses aids""[All Fields] OR ""nursing personnel""[All Fields] OR ""Caregivers""[MeSH Terms] OR ""Nursing""[MeSH Terms] OR ""Nursing""[MeSH Subheading] OR ""Nursing Care""[MeSH Terms] OR ""Nurses""[MeSH Terms] OR ""Nursing Staff""[MeSH Terms] OR ""Nursing Care""[MeSH Terms] OR ""Nurse's Role""[MeSH Terms] OR ""Home Health Aides""[MeSH Terms] OR ""Nursing Assistants""[MeSH Terms] OR ""Licensed Practical Nurses""[MeSH Terms] OR ""Home Care Services""[MeSH Terms] OR ""nurs*""[Title/Abstract] OR ""home care""[Title/Abstract] OR ""home healthcare""[Title/Abstract] OR ""home health care""[Title/Abstract] OR ""care aide*""[Title/Abstract] OR ""home health aide*""[Title/Abstract]"                                                                                                                                                                                                                                                                                                                                                                                                                                                                                                                                                                                                                                                                                                                                                                                                                                                                                                                                                                                                                                                                                                                                                                                                                                                                                                                                                                                                                                                                                                                                                                                                                                                                                                                                                                                                                                                                                                                                                                                                                 |           |
| #4 | ""Oral Health screening tool"" OR ""Geriatric Assessment""[Mesh] OR ""assessment tool"" OR ""needs assessment""[Mesh] OR ""oral assessment"" OR ""assessment scale"" OR ""Surveys and Questionnaires""[Mesh] OR questionnaire*[tiab] OR instrument*[tiab] OR measure*[tiab] OR survey*[tiab]",Publication Date.,""Oral Health screening tool""[All Fields] OR ""Geriatric Assessment""[MeSH Terms] OR ""assessment tool""[All Fields] OR ""needs assessment""[MeSH Terms] OR ""oral assessment""[All Fields] OR ""assessment scale""[All Fields] OR ""Surveys and Questionnaires""[MeSH Terms] OR ""questionnaire*""[Title/Abstract] OR ""instrument*""[Title/Abstract] OR ""measure*""[Title/Abstract] OR ""survey*""[Title/Abstract]"                                                                                                                                                                                                                                                                                                                                                                                                                                                                                                                                                                                                                                                                                                                                                                                                                                                                                                                                                                                                                                                                                                                                                                                                                                                                                                                                                                                                                                                                                                                                                                                                                                                                                                                                                                                                                                                                                                                                                                                                                                                                  | 4,917,678 |
| #5 | "(instrumentation[sh] OR methods[sh] OR ""Validation Studies""[pt] OR ""Comparative Study""[pt] OR ""psychometrics""[MeSH] OR psychometr*[tiab] OR clinimetr*[tw] OR clinometr*[tw] OR ""outcome assessment (health care)""[MeSH] OR ""outcome assessment""[tiab] OR ""outcome measure*""[tw] OR ""observer variation""[MeSH] OR ""observer variation""[tiab] OR ""Health Status Indicators""[Mesh] OR ""reproducibility of results""[MeSH] OR reproducib*[tiab] OR ""discriminant analysis""[MeSH] OR reliab*[tiab] OR unreliab*[tiab] OR valid*[tiab] OR ""coefficient of variation""[tiab] OR coefficient[tiab] OR homogeneity[tiab] OR homogeneous[tiab] OR ""internal consistency""[tiab] OR (cronbach*[tiab] AND (alpha[tiab] OR alphas[tiab])) OR (item[tiab] AND (correlation*[tiab] OR selection*[tiab] OR reduction*[tiab])) OR agreement[tw] OR precision[tw] OR imprecision[tw] OR ""precise values""[tw] OR test-retest[tiab] OR (test[tiab] AND retest[tiab]) OR (reliab*[tiab] AND (test[tiab] OR retest[tiab])) OR stability[tiab] OR interrater[tiab] OR inter-rater[tiab] OR intrarater[tiab] OR intra-rater[tiab] OR intertester[tiab] OR inter-tester[tiab] OR intratester[tiab] OR intra-tester[tiab] OR interobserver[tiab] OR inter-observer[tiab] OR intraobserver[tiab] OR intra-observer[tiab] OR intertechnician[tiab] OR inter-technician[tiab] OR intratechnician[tiab] OR intra-technician[tiab] OR interexaminer[tiab] OR inter-examiner[tiab] OR intraexaminer[tiab] OR intra-examiner[tiab] OR interassay[tiab] OR inter-assay[tiab] OR intraassay[tiab] OR intra-assay[tiab] OR interindividual[tiab] OR inter-individual[tiab] OR intraindividual[tiab] OR intra-individual[tiab] OR interparticipant[tiab] OR inter-participant[tiab] OR intraparticipant[tiab] OR intra-participant[tiab] OR kappa[tiab] OR kappa's[tiab] OR kappas[tiab] OR repeatab*[tw] OR ((replicab*[tw] OR repeated[tw] AND (measure[tw] OR measures[tw] OR findings[tw] OR result[tw] OR results[tw] OR test[tw] OR tests[tw])) OR generaliza*[tiab] OR generalisa*[tiab] OR concordance[tiab] OR (intraclass[tiab] AND correlation*[tiab]) OR discriminative[tiab] OR ""known group""[tiab] OR ""factor analysis""[tiab] OR ""factor analyses""[tiab] OR ""factor structure""[tiab] OR ""factor structures""[tiab] OR dimension*[tiab] OR subscale*[tiab] OR (multitrait[tiab] AND scaling[tiab] AND (analysis[tiab] OR analyses[tiab])) OR ""item discriminant""[tiab] OR ""interscale correlation*""[tiab] OR error[tiab] OR errors[tiab] OR ""individual variability""[tiab] OR ""interval variability""[tiab] OR ""rate variability""[tiab] OR (variability[tiab] AND (analysis[tiab] OR values[tiab])) OR (uncertainty[tiab] AND (measurement[tiab] OR measuring[tiab])) OR ""standard | 9,508,385 |

|                                                                                                                                                                                                                                                                                                                                                                                                                                                                                                                                                                                                                                                                                                                                                                                                                                                                                                                                                                                                                                                                                                                                                                                                                                                                                                                                                                                                                                                                                                                                                                                                                                                                                                                                                                                                                                                                                                                                                                                                                                                                                                                                                                                                                                                                                                                                                                                                                                                                                                                                                                                                                                                                                                                                                                                                                                                                                                                                                                                                                                                                                                                                                                                                                                                                                                                                                                                                                                                                                                                                                                                                                                                                                                                                                                                                                                                                                                                                                                                                                                                                                                                                                                                                                                                                                                                                                                                                     |  |
|-----------------------------------------------------------------------------------------------------------------------------------------------------------------------------------------------------------------------------------------------------------------------------------------------------------------------------------------------------------------------------------------------------------------------------------------------------------------------------------------------------------------------------------------------------------------------------------------------------------------------------------------------------------------------------------------------------------------------------------------------------------------------------------------------------------------------------------------------------------------------------------------------------------------------------------------------------------------------------------------------------------------------------------------------------------------------------------------------------------------------------------------------------------------------------------------------------------------------------------------------------------------------------------------------------------------------------------------------------------------------------------------------------------------------------------------------------------------------------------------------------------------------------------------------------------------------------------------------------------------------------------------------------------------------------------------------------------------------------------------------------------------------------------------------------------------------------------------------------------------------------------------------------------------------------------------------------------------------------------------------------------------------------------------------------------------------------------------------------------------------------------------------------------------------------------------------------------------------------------------------------------------------------------------------------------------------------------------------------------------------------------------------------------------------------------------------------------------------------------------------------------------------------------------------------------------------------------------------------------------------------------------------------------------------------------------------------------------------------------------------------------------------------------------------------------------------------------------------------------------------------------------------------------------------------------------------------------------------------------------------------------------------------------------------------------------------------------------------------------------------------------------------------------------------------------------------------------------------------------------------------------------------------------------------------------------------------------------------------------------------------------------------------------------------------------------------------------------------------------------------------------------------------------------------------------------------------------------------------------------------------------------------------------------------------------------------------------------------------------------------------------------------------------------------------------------------------------------------------------------------------------------------------------------------------------------------------------------------------------------------------------------------------------------------------------------------------------------------------------------------------------------------------------------------------------------------------------------------------------------------------------------------------------------------------------------------------------------------------------------------------------------------------|--|
| <p>error of measurement"[tiab] OR sensitiv*[tiab] OR responsive*[tiab] OR (limit[tiab] AND detection[tiab]) OR ""minimal detectable concentration""[tiab] OR interpretab*[tiab] OR ((minimal[tiab] OR minimally[tiab] OR clinical[tiab] OR clinically[tiab]) AND (important[tiab] OR significant[tiab] OR detectable[tiab]) AND (change[tiab] OR difference[tiab])) OR (small*[tiab] AND (real[tiab] OR detectable[tiab]) AND (change[tiab] OR difference[tiab])) OR ""meaningful change""[tiab] OR ""ceiling effect""[tiab] OR ""floor effect""[tiab] OR ""Item response model""[tiab] OR IRT[tiab] OR Rasch[tiab] OR ""Differential item functioning""[tiab] OR DIF[tiab] OR ""computer adaptive testing""[tiab] OR ""item bank""[tiab] OR ""cross-cultural equivalence""[tiab]"",Publication Date,, ""instrumentation""[MeSH Subheading] OR ""methods""[MeSH Subheading] OR ""Comparative Study""[Publication Type] OR ""psychometrics""[MeSH Terms] OR ""psychometr*""[Title/Abstract] OR ""clinimetr*""[Text Word] OR ""clinometr*""[Text Word] OR ""outcome assessment""[Title/Abstract] OR ""outcome measure*""[Text Word] OR ""observer variation""[MeSH Terms] OR ""observer variation""[Title/Abstract] OR ""Health Status Indicators""[MeSH Terms] OR ""reproducibility of results""[MeSH Terms] OR ""reproducib*""[Title/Abstract] OR ""discriminant analysis""[MeSH Terms] OR ""reliab*""[Title/Abstract] OR ""unreliab*""[Title/Abstract] OR ""valid*""[Title/Abstract] OR ""coefficient of variation""[Title/Abstract] OR ""coefficient""[Title/Abstract] OR ""homogeneity""[Title/Abstract] OR ""homogeneous""[Title/Abstract] OR ""internal consistency""[Title/Abstract] OR (""cronbach*""[Title/Abstract] AND (""alpha""[Title/Abstract] OR ""alphas""[Title/Abstract])) OR (""item""[Title/Abstract] AND (""correlation*""[Title/Abstract] OR ""selection*""[Title/Abstract] OR ""reduction*""[Title/Abstract])) OR ""agreement""[Text Word] OR ""precision""[Text Word] OR ""imprecision""[Text Word] OR ""precise values""[Text Word] OR ""test-retest""[Title/Abstract] OR (""test""[Title/Abstract] AND ""retest""[Title/Abstract]) OR (""reliab*""[Title/Abstract] AND (""test""[Title/Abstract] OR ""retest""[Title/Abstract])) OR ""stability""[Title/Abstract] OR ""intrater""[Title/Abstract] OR ""inter-rater""[Title/Abstract] OR ""inrater""[Title/Abstract] OR ""intra-rater""[Title/Abstract] OR ""intertester""[Title/Abstract] OR ""inter-tester""[Title/Abstract] OR ""inrater""[Title/Abstract] OR ""intra-tester""[Title/Abstract] OR ""interobserver""[Title/Abstract] OR ""inter-observer""[Title/Abstract] OR ""intraobserver""[Title/Abstract] OR ""intra-observer""[Title/Abstract] OR ""intertechician""[Title/Abstract] OR ""inter-technician""[Title/Abstract] OR ""inratechnician""[Title/Abstract] OR ""intra-technician""[Title/Abstract] OR ""interexaminer""[Title/Abstract] OR ""inter-examiner""[Title/Abstract] OR ""intraexaminer""[Title/Abstract] OR ""intra-examiner""[Title/Abstract] OR ""interassay""[Title/Abstract] OR ""inter-assay""[Title/Abstract] OR ""intraassay""[Title/Abstract] OR ""intra-assay""[Title/Abstract] OR ""interindividual""[Title/Abstract] OR ""inter-individual""[Title/Abstract] OR ""intraindividual""[Title/Abstract] OR ""intra-individual""[Title/Abstract] OR ""interparticipant""[Title/Abstract] OR ""inter-participant""[Title/Abstract] OR ""intraparticipant""[Title/Abstract] OR ""intra-participant""[Title/Abstract] OR ""kappa""[Title/Abstract] OR ""kappa's""[Title/Abstract] OR ""kappas""[Title/Abstract] OR ""repeatab*""[Text Word] OR (""replicab*""[Text Word] OR ""repeated""[Text Word]) AND (""measure""[Text Word] OR ""measures""[Text Word] OR ""findings""[Text Word] OR ""result""[Text Word] OR ""results""[Text Word] OR ""test""[Text Word] OR ""tests""[Text Word]) OR ""generaliza*""[Title/Abstract] OR ""generalisa*""[Title/Abstract] OR ""concordance""[Title/Abstract] OR (""intraclass""[Title/Abstract] AND ""correlation*""[Title/Abstract]) OR ""discriminative""[Title/Abstract] OR ""known group""[Title/Abstract] OR ""factor analysis""[Title/Abstract] OR ""factor analyses""[Title/Abstract] OR ""factor structure""[Title/Abstract] OR ""factor structures""[Title/Abstract] OR ""dimension*""[Title/Abstract] OR ""subscale*""[Title/Abstract] OR</p> |  |
|-----------------------------------------------------------------------------------------------------------------------------------------------------------------------------------------------------------------------------------------------------------------------------------------------------------------------------------------------------------------------------------------------------------------------------------------------------------------------------------------------------------------------------------------------------------------------------------------------------------------------------------------------------------------------------------------------------------------------------------------------------------------------------------------------------------------------------------------------------------------------------------------------------------------------------------------------------------------------------------------------------------------------------------------------------------------------------------------------------------------------------------------------------------------------------------------------------------------------------------------------------------------------------------------------------------------------------------------------------------------------------------------------------------------------------------------------------------------------------------------------------------------------------------------------------------------------------------------------------------------------------------------------------------------------------------------------------------------------------------------------------------------------------------------------------------------------------------------------------------------------------------------------------------------------------------------------------------------------------------------------------------------------------------------------------------------------------------------------------------------------------------------------------------------------------------------------------------------------------------------------------------------------------------------------------------------------------------------------------------------------------------------------------------------------------------------------------------------------------------------------------------------------------------------------------------------------------------------------------------------------------------------------------------------------------------------------------------------------------------------------------------------------------------------------------------------------------------------------------------------------------------------------------------------------------------------------------------------------------------------------------------------------------------------------------------------------------------------------------------------------------------------------------------------------------------------------------------------------------------------------------------------------------------------------------------------------------------------------------------------------------------------------------------------------------------------------------------------------------------------------------------------------------------------------------------------------------------------------------------------------------------------------------------------------------------------------------------------------------------------------------------------------------------------------------------------------------------------------------------------------------------------------------------------------------------------------------------------------------------------------------------------------------------------------------------------------------------------------------------------------------------------------------------------------------------------------------------------------------------------------------------------------------------------------------------------------------------------------------------------------------------------------------|--|

|    |                                                                                                                                                                                                                                                                                                                                                                                                                                                                                                                                                                                                                                                                                                                                                                                                                                                                                                                                                                                                                                                                                                                                                                                                                                                                                                                                                                                                                                                                                                                                                                                                                                                                                                                                                                     |           |
|----|---------------------------------------------------------------------------------------------------------------------------------------------------------------------------------------------------------------------------------------------------------------------------------------------------------------------------------------------------------------------------------------------------------------------------------------------------------------------------------------------------------------------------------------------------------------------------------------------------------------------------------------------------------------------------------------------------------------------------------------------------------------------------------------------------------------------------------------------------------------------------------------------------------------------------------------------------------------------------------------------------------------------------------------------------------------------------------------------------------------------------------------------------------------------------------------------------------------------------------------------------------------------------------------------------------------------------------------------------------------------------------------------------------------------------------------------------------------------------------------------------------------------------------------------------------------------------------------------------------------------------------------------------------------------------------------------------------------------------------------------------------------------|-----------|
|    | (("multitrait"[Title/Abstract] AND "scaling"[Title/Abstract] AND ("analysis"[Title/Abstract] OR "analyses"[Title/Abstract])) OR "item discriminant"[Title/Abstract] OR "interscale correlation*"[Title/Abstract] OR "error"[Title/Abstract] OR "errors"[Title/Abstract] OR "individual variability"[Title/Abstract] OR "interval variability"[Title/Abstract] OR "rate variability"[Title/Abstract] OR ("variability"[Title/Abstract] AND ("analysis"[Title/Abstract] OR "values"[Title/Abstract])) OR ("uncertainty"[Title/Abstract] AND ("measurement"[Title/Abstract] OR "measuring"[Title/Abstract])) OR "standard error of measurement"[Title/Abstract] OR "sensitivity*"[Title/Abstract] OR "responsive*"[Title/Abstract] OR ("limit"[Title/Abstract] AND "detection"[Title/Abstract]) OR "minimal detectable concentration"[Title/Abstract] OR "interpretab*"[Title/Abstract] OR (("minimal"[Title/Abstract] OR "minimally"[Title/Abstract] OR "clinical"[Title/Abstract] OR "clinically"[Title/Abstract]) AND ("important"[Title/Abstract] OR "significant"[Title/Abstract] OR "detectable"[Title/Abstract]) AND ("change"[Title/Abstract] OR "difference"[Title/Abstract])) OR ("small*"[Title/Abstract] AND ("real"[Title/Abstract] OR "detectable"[Title/Abstract]) AND ("change"[Title/Abstract] OR "difference"[Title/Abstract])) OR "meaningful change"[Title/Abstract] OR "ceiling effect"[Title/Abstract] OR "floor effect"[Title/Abstract] OR "Item response model"[Title/Abstract] OR "IRT"[Title/Abstract] OR "Rasch"[Title/Abstract] OR "Differential item functioning"[Title/Abstract] OR "DIF"[Title/Abstract] OR "computer adaptive testing"[Title/Abstract] OR "item bank"[Title/Abstract] OR "cross-cultural equivalence"[Title/Abstract]" |           |
| #6 | ("addresses"[Publication Type] OR "biography"[Publication Type] OR "case reports"[Publication Type] OR "comment"[Publication Type] OR "directory"[Publication Type] OR "editorial"[Publication Type] OR "festschrift"[Publication Type] OR "interview"[Publication Type] OR "lectures"[Publication Type] OR "legal cases"[Publication Type] OR "legislation"[Publication Type] OR "letter"[Publication Type] OR "news"[Publication Type] OR "newspaper article"[Publication Type] OR "patient education handout"[Publication Type] OR "popular works"[Publication Type] OR "congresses"[Publication Type] OR "consensus development conference"[Publication Type] OR "consensus development conference, nih"[Publication Type] OR "practice guideline"[Publication Type] NOT ("animals"[MeSH Terms] NOT "humans"[MeSH Terms]), "Publication Date,," ("biography"[Publication Type] OR "case reports"[Publication Type] OR "comment"[Publication Type] OR "directory"[Publication Type] OR "editorial"[Publication Type] OR "festschrift"[Publication Type] OR "interview"[Publication Type] OR "legislation"[Publication Type] OR "letter"[Publication Type] OR "news"[Publication Type] OR "newspaper article"[Publication Type] OR "patient education handout"[Publication Type] OR "consensus development conference"[Publication Type] OR "consensus development conference, nih"[Publication Type] OR "practice guideline"[Publication Type] NOT ("animals"[MeSH Terms] NOT "humans"[MeSH Terms])"                                                                                                                                                                                                                                                             | 4,188,714 |
| #7 | #1 AND #2 AND #3 AND #4 AND #5, Publication Date,," ("Oral Health"[MeSH Terms] OR "Geriatric Dentistry"[MeSH Terms] OR "Dental Care"[MeSH Terms] OR "Dental Care for Aged"[MeSH Terms] OR "Dentistry"[MeSH Terms] OR "Dentists"[MeSH Terms] OR "dental*"[Title] OR "dentist*"[Title] OR "oral hygien*"[Title] OR "dental*"[Other Term] OR "dentist*"[Other Term] OR "oral hygien*"[Other Term]) AND ("Aged"[MeSH Terms] OR "aged, 80 and over"[MeSH Terms] OR "Frail Elderly"[MeSH Terms] OR "Geriatrics"[MeSH Terms] OR "Geriatric Psychiatry"[MeSH Terms] OR "Geriatric Nursing"[MeSH Terms] OR "Geriatric Dentistry"[MeSH Terms] OR "Dental Care for Aged"[MeSH Terms] OR "Health Services for the Aged"[MeSH Terms] OR ("elder*"[Text Word] OR "eldest"[Text Word])                                                                                                                                                                                                                                                                                                                                                                                                                                                                                                                                                                                                                                                                                                                                                                                                                                                                                                                                                                                             | 423       |

|                                                                                                                                                                                                                                                                                                                                                                                                                                                                                                                                                                                                                                                                                                                                                                                                                                                                                                                                                                                                                                                                                                                                                                                                                                                                                                                                                                                                                                                                                                                                                                                                                                                                                                                                                                                                                                                                                                                                                                                                                                                                                                                                                                                                                                                                                                                                                                                                                                                                                                                                                                                                                                                                                                                                                                                                                                                                                                                                                                                                                                                                                                                                                                                                                                                                                                                                                                                                                                                                                                                                                                                                                                                                                                                                                                                                                                                                                                                                                                                                                                                                                                                                                                                                                                                                                                                     |  |
|---------------------------------------------------------------------------------------------------------------------------------------------------------------------------------------------------------------------------------------------------------------------------------------------------------------------------------------------------------------------------------------------------------------------------------------------------------------------------------------------------------------------------------------------------------------------------------------------------------------------------------------------------------------------------------------------------------------------------------------------------------------------------------------------------------------------------------------------------------------------------------------------------------------------------------------------------------------------------------------------------------------------------------------------------------------------------------------------------------------------------------------------------------------------------------------------------------------------------------------------------------------------------------------------------------------------------------------------------------------------------------------------------------------------------------------------------------------------------------------------------------------------------------------------------------------------------------------------------------------------------------------------------------------------------------------------------------------------------------------------------------------------------------------------------------------------------------------------------------------------------------------------------------------------------------------------------------------------------------------------------------------------------------------------------------------------------------------------------------------------------------------------------------------------------------------------------------------------------------------------------------------------------------------------------------------------------------------------------------------------------------------------------------------------------------------------------------------------------------------------------------------------------------------------------------------------------------------------------------------------------------------------------------------------------------------------------------------------------------------------------------------------------------------------------------------------------------------------------------------------------------------------------------------------------------------------------------------------------------------------------------------------------------------------------------------------------------------------------------------------------------------------------------------------------------------------------------------------------------------------------------------------------------------------------------------------------------------------------------------------------------------------------------------------------------------------------------------------------------------------------------------------------------------------------------------------------------------------------------------------------------------------------------------------------------------------------------------------------------------------------------------------------------------------------------------------------------------------------------------------------------------------------------------------------------------------------------------------------------------------------------------------------------------------------------------------------------------------------------------------------------------------------------------------------------------------------------------------------------------------------------------------------------------------------------------------|--|
| <p>OR ""frail*""[Text Word] OR ""geriatri*""[Text Word] OR ""old age*""[Text Word] OR ""oldest old*""[Text Word] OR ""senior*""[Text Word] OR ""senium""[Text Word] OR ""very old*""[Text Word] OR ""septuagenarian*""[Text Word] OR ""octagenarian*""[Text Word] OR ""octogenarian*""[Text Word] OR ""nonagenarian*""[Text Word] OR ""centarian*""[Text Word] OR ""centenarian*""[Text Word] OR ""supercentenarian*""[Text Word] OR ""older people""[Text Word] OR ""older subject*""[Text Word] OR ""older patient*""[Text Word] OR ""older age*""[Text Word] OR ""older adult*""[Text Word] OR ""older man""[Text Word] OR ""older men""[Text Word] OR ""older male*""[Text Word] OR ""older woman""[Text Word] OR ""older women""[Text Word] OR ""older female*""[Text Word] OR ""older population*""[Text Word] OR ""older person*""[Text Word])) AND (""nursing homes""[MeSH Terms] OR ""long term care""[MeSH Terms] OR ""residential care""[All Fields] OR ""homes for the aged""[MeSH Terms] OR ""residential facilities""[MeSH Terms] OR ""long-term care institution""[All Fields] OR ""residential aged care""[All Fields] OR ""skilled nursing facilities""[MeSH Terms] OR ""nursing facility""[All Fields] OR ""care worker""[All Fields] OR ""nurses aids""[All Fields] OR ""nursing personnel""[All Fields] OR ""Caregivers""[MeSH Terms] OR ""Nursing""[MeSH Terms] OR ""Nursing""[MeSH Subheading] OR ""Nursing Care""[MeSH Terms] OR ""Nurses""[MeSH Terms] OR ""Nursing Staff""[MeSH Terms] OR ""Nursing Care""[MeSH Terms] OR ""Nurse's Role""[MeSH Terms] OR ""Home Health Aides""[MeSH Terms] OR ""Nursing Assistants""[MeSH Terms] OR ""Licensed Practical Nurses""[MeSH Terms] OR ""Home Care Services""[MeSH Terms] OR ""nurs*""[Title/Abstract] OR ""home care""[Title/Abstract] OR ""home healthcare""[Title/Abstract] OR ""home health care""[Title/Abstract] OR ""care aide*""[Title/Abstract] OR ""home health aide*""[Title/Abstract]) AND (""Oral Health screening tool""[All Fields] OR ""Geriatric Assessment""[MeSH Terms] OR ""assessment tool""[All Fields] OR ""needs assessment""[MeSH Terms] OR ""oral assessment""[All Fields] OR ""assessment scale""[All Fields] OR ""Surveys and Questionnaires""[MeSH Terms] OR ""questionnaire*""[Title/Abstract] OR ""instrument*""[Title/Abstract] OR ""measure*""[Title/Abstract] OR ""survey*""[Title/Abstract] AND (""instrumentation""[MeSH Subheading] OR ""methods""[MeSH Subheading] OR ""Comparative Study""[Publication Type] OR ""psychometrics""[MeSH Terms] OR ""psychometr*""[Title/Abstract] OR ""clinimetr*""[Text Word] OR ""clinometr*""[Text Word] OR ""outcome assessment""[Title/Abstract] OR ""outcome measure*""[Text Word] OR ""observer variation""[MeSH Terms] OR ""observer variation""[Title/Abstract] OR ""Health Status Indicators""[MeSH Terms] OR ""reproducibility of results""[MeSH Terms] OR ""reproducib*""[Title/Abstract] OR ""discriminant analysis""[MeSH Terms] OR ""reliab*""[Title/Abstract] OR ""unreliab*""[Title/Abstract] OR ""valid*""[Title/Abstract] OR ""coefficient of variation""[Title/Abstract] OR ""coefficient""[Title/Abstract] OR ""homogeneity""[Title/Abstract] OR ""homogeneous""[Title/Abstract] OR ""internal consistency""[Title/Abstract] OR ""cronbach*""[Title/Abstract] AND (""alpha""[Title/Abstract] OR ""alphas""[Title/Abstract])) OR (""item""[Title/Abstract] AND (""correlation*""[Title/Abstract] OR ""selection*""[Title/Abstract] OR ""reduction*""[Title/Abstract])) OR ""agreement""[Text Word] OR ""precision""[Text Word] OR ""imprecision""[Text Word] OR ""precise values""[Text Word] OR ""test-retest""[Title/Abstract] OR (""test""[Title/Abstract] AND ""retest""[Title/Abstract]) OR (""reliab*""[Title/Abstract] AND (""test""[Title/Abstract] OR ""retest""[Title/Abstract])) OR ""stability""[Title/Abstract] OR ""interrater""[Title/Abstract] OR ""inter-rater""[Title/Abstract] OR ""intra-rater""[Title/Abstract] OR ""intra-rater""[Title/Abstract] OR ""intertester""[Title/Abstract] OR ""inter-tester""[Title/Abstract] OR ""intratester""[Title/Abstract] OR ""intra-tester""[Title/Abstract] OR ""interobserver""[Title/Abstract] OR ""inter-observer""[Title/Abstract] OR ""intraobserver""[Title/Abstract] OR ""intra-</p> |  |
|---------------------------------------------------------------------------------------------------------------------------------------------------------------------------------------------------------------------------------------------------------------------------------------------------------------------------------------------------------------------------------------------------------------------------------------------------------------------------------------------------------------------------------------------------------------------------------------------------------------------------------------------------------------------------------------------------------------------------------------------------------------------------------------------------------------------------------------------------------------------------------------------------------------------------------------------------------------------------------------------------------------------------------------------------------------------------------------------------------------------------------------------------------------------------------------------------------------------------------------------------------------------------------------------------------------------------------------------------------------------------------------------------------------------------------------------------------------------------------------------------------------------------------------------------------------------------------------------------------------------------------------------------------------------------------------------------------------------------------------------------------------------------------------------------------------------------------------------------------------------------------------------------------------------------------------------------------------------------------------------------------------------------------------------------------------------------------------------------------------------------------------------------------------------------------------------------------------------------------------------------------------------------------------------------------------------------------------------------------------------------------------------------------------------------------------------------------------------------------------------------------------------------------------------------------------------------------------------------------------------------------------------------------------------------------------------------------------------------------------------------------------------------------------------------------------------------------------------------------------------------------------------------------------------------------------------------------------------------------------------------------------------------------------------------------------------------------------------------------------------------------------------------------------------------------------------------------------------------------------------------------------------------------------------------------------------------------------------------------------------------------------------------------------------------------------------------------------------------------------------------------------------------------------------------------------------------------------------------------------------------------------------------------------------------------------------------------------------------------------------------------------------------------------------------------------------------------------------------------------------------------------------------------------------------------------------------------------------------------------------------------------------------------------------------------------------------------------------------------------------------------------------------------------------------------------------------------------------------------------------------------------------------------------------------------------------|--|

|    |                                                                                                                                                                                                                                                                                                                                                                                                                                                                                                                                                                                                                                                                                                                                                                                                                                                                                                                                                                                                                                                                                                                                                                                                                                                                                                                                                                                                                                                                                                                                                                                                                                                                                                                                                                                                                                                                                                                                                                                                                                                                                                                                                                                                                                                                                                                                                                                                                                                                                                                                                                                                                                                                                                                                                                                                                                                                                                                                                                                                                                                                                                                                                                                                                                                                                                                                                                  |     |
|----|------------------------------------------------------------------------------------------------------------------------------------------------------------------------------------------------------------------------------------------------------------------------------------------------------------------------------------------------------------------------------------------------------------------------------------------------------------------------------------------------------------------------------------------------------------------------------------------------------------------------------------------------------------------------------------------------------------------------------------------------------------------------------------------------------------------------------------------------------------------------------------------------------------------------------------------------------------------------------------------------------------------------------------------------------------------------------------------------------------------------------------------------------------------------------------------------------------------------------------------------------------------------------------------------------------------------------------------------------------------------------------------------------------------------------------------------------------------------------------------------------------------------------------------------------------------------------------------------------------------------------------------------------------------------------------------------------------------------------------------------------------------------------------------------------------------------------------------------------------------------------------------------------------------------------------------------------------------------------------------------------------------------------------------------------------------------------------------------------------------------------------------------------------------------------------------------------------------------------------------------------------------------------------------------------------------------------------------------------------------------------------------------------------------------------------------------------------------------------------------------------------------------------------------------------------------------------------------------------------------------------------------------------------------------------------------------------------------------------------------------------------------------------------------------------------------------------------------------------------------------------------------------------------------------------------------------------------------------------------------------------------------------------------------------------------------------------------------------------------------------------------------------------------------------------------------------------------------------------------------------------------------------------------------------------------------------------------------------------------------|-----|
|    | <p>observer"[Title/Abstract] OR "intertechnician"[Title/Abstract] OR "inter-technician"[Title/Abstract] OR "intratechnician"[Title/Abstract] OR "intra-technician"[Title/Abstract] OR "interexaminer"[Title/Abstract] OR "inter-examiner"[Title/Abstract] OR "intraexaminer"[Title/Abstract] OR "intra-examiner"[Title/Abstract] OR "interassay"[Title/Abstract] OR "inter-assay"[Title/Abstract] OR "intraassay"[Title/Abstract] OR "intra-assay"[Title/Abstract] OR "interindividual"[Title/Abstract] OR "inter-individual"[Title/Abstract] OR "intraindividual"[Title/Abstract] OR "intra-individual"[Title/Abstract] OR "interparticipant"[Title/Abstract] OR "inter-participant"[Title/Abstract] OR "intraparticipant"[Title/Abstract] OR "intra-participant"[Title/Abstract] OR "kappa"[Title/Abstract] OR "kappa's"[Title/Abstract] OR "kappas"[Title/Abstract] OR "repeatable"[Text Word] OR ("replicab"[Text Word] OR "repeated"[Text Word]) AND ("measure"[Text Word] OR "measures"[Text Word] OR "findings"[Text Word] OR "result"[Text Word] OR "results"[Text Word] OR "test"[Text Word] OR "tests"[Text Word]) OR "generaliza"[Title/Abstract] OR "generalisa"[Title/Abstract] OR "concordance"[Title/Abstract] OR ("intraclass"[Title/Abstract] AND "correlation"[Title/Abstract]) OR "discriminative"[Title/Abstract] OR "known group"[Title/Abstract] OR "factor analysis"[Title/Abstract] OR "factor analyses"[Title/Abstract] OR "factor structure"[Title/Abstract] OR "factor structures"[Title/Abstract] OR "dimension"[Title/Abstract] OR "subscale"[Title/Abstract] OR ("multitrait"[Title/Abstract] AND "scaling"[Title/Abstract] AND ("analysis"[Title/Abstract] OR "analyses"[Title/Abstract])) OR "item discriminant"[Title/Abstract] OR "interscale correlation"[Title/Abstract] OR "error"[Title/Abstract] OR "errors"[Title/Abstract] OR "individual variability"[Title/Abstract] OR "interval variability"[Title/Abstract] OR "rate variability"[Title/Abstract] OR ("variability"[Title/Abstract] AND ("analysis"[Title/Abstract] OR "values"[Title/Abstract])) OR ("uncertainty"[Title/Abstract] AND ("measurement"[Title/Abstract] OR "measuring"[Title/Abstract])) OR "standard error of measurement"[Title/Abstract] OR "sensitive"[Title/Abstract] OR "responsive"[Title/Abstract] OR ("limit"[Title/Abstract] AND "detection"[Title/Abstract]) OR "minimal detectable concentration"[Title/Abstract] OR "interpretability"[Title/Abstract] OR ("minimal"[Title/Abstract] OR "minimally"[Title/Abstract] OR "clinical"[Title/Abstract] OR "clinically"[Title/Abstract]) AND ("important"[Title/Abstract] OR "significant"[Title/Abstract] OR "detectable"[Title/Abstract]) AND ("change"[Title/Abstract] OR "difference"[Title/Abstract]) OR ("small"[Title/Abstract] AND ("real"[Title/Abstract] OR "detectable"[Title/Abstract]) AND ("change"[Title/Abstract] OR "difference"[Title/Abstract])) OR "meaningful change"[Title/Abstract] OR "ceiling effect"[Title/Abstract] OR "floor effect"[Title/Abstract] OR "Item response model"[Title/Abstract] OR "IRT"[Title/Abstract] OR "Rasch"[Title/Abstract] OR "Differential item functioning"[Title/Abstract] OR "DIF"[Title/Abstract] OR "computer adaptive testing"[Title/Abstract] OR "item bank"[Title/Abstract] OR "cross-cultural equivalence"[Title/Abstract]"</p> |     |
| #8 | <p>#7 NOT #6,Publication Date.,("Oral Health"[MeSH Terms] OR "Geriatric Dentistry"[MeSH Terms] OR "Dental Care"[MeSH Terms] OR "Dental Care for Aged"[MeSH Terms] OR "Dentistry"[MeSH Terms] OR "Dentists"[MeSH Terms] OR "dental"[Title] OR "dentist"[Title] OR "oral hygien"[Title] OR "dental"[Other Term] OR "dentist"[Other Term] OR "oral hygien"[Other Term]) AND ("Aged"[MeSH Terms] OR "aged, 80 and over"[MeSH Terms] OR "Frail Elderly"[MeSH Terms] OR "Geriatrics"[MeSH Terms] OR "Geriatric Psychiatry"[MeSH Terms] OR "Geriatric Nursing"[MeSH Terms] OR "Geriatric Dentistry"[MeSH Terms] OR "Dental Care for Aged"[MeSH Terms] OR "Health Services for the Aged"[MeSH Terms] OR ("elder"[Text Word] OR "eldest"[Text Word] OR "frail"[Text Word] OR "geriatri"[Text Word] OR "old age"[Text</p>                                                                                                                                                                                                                                                                                                                                                                                                                                                                                                                                                                                                                                                                                                                                                                                                                                                                                                                                                                                                                                                                                                                                                                                                                                                                                                                                                                                                                                                                                                                                                                                                                                                                                                                                                                                                                                                                                                                                                                                                                                                                                                                                                                                                                                                                                                                                                                                                                                                                                                                                                  | 420 |

|                                                                                                                                                                                                                                                                                                                                                                                                                                                                                                                                                                                                                                                                                                                                                                                                                                                                                                                                                                                                                                                                                                                                                                                                                                                                                                                                                                                                                                                                                                                                                                                                                                                                                                                                                                                                                                                                                                                                                                                                                                                                                                                                                                                                                                                                                                                                                                                                                                                                                                                                                                                                                                                                                                                                                                                                                                                                                                                                                                                                                                                                                                                                                                                                                                                                                                                                                                                                                                                                                                                                                                                                                                                                                                                                                                                                                                                                                                                                                                                                                                                                                                                                                                                                                                                                                                                        |  |
|------------------------------------------------------------------------------------------------------------------------------------------------------------------------------------------------------------------------------------------------------------------------------------------------------------------------------------------------------------------------------------------------------------------------------------------------------------------------------------------------------------------------------------------------------------------------------------------------------------------------------------------------------------------------------------------------------------------------------------------------------------------------------------------------------------------------------------------------------------------------------------------------------------------------------------------------------------------------------------------------------------------------------------------------------------------------------------------------------------------------------------------------------------------------------------------------------------------------------------------------------------------------------------------------------------------------------------------------------------------------------------------------------------------------------------------------------------------------------------------------------------------------------------------------------------------------------------------------------------------------------------------------------------------------------------------------------------------------------------------------------------------------------------------------------------------------------------------------------------------------------------------------------------------------------------------------------------------------------------------------------------------------------------------------------------------------------------------------------------------------------------------------------------------------------------------------------------------------------------------------------------------------------------------------------------------------------------------------------------------------------------------------------------------------------------------------------------------------------------------------------------------------------------------------------------------------------------------------------------------------------------------------------------------------------------------------------------------------------------------------------------------------------------------------------------------------------------------------------------------------------------------------------------------------------------------------------------------------------------------------------------------------------------------------------------------------------------------------------------------------------------------------------------------------------------------------------------------------------------------------------------------------------------------------------------------------------------------------------------------------------------------------------------------------------------------------------------------------------------------------------------------------------------------------------------------------------------------------------------------------------------------------------------------------------------------------------------------------------------------------------------------------------------------------------------------------------------------------------------------------------------------------------------------------------------------------------------------------------------------------------------------------------------------------------------------------------------------------------------------------------------------------------------------------------------------------------------------------------------------------------------------------------------------------------------------------|--|
| <p>Word] OR ""oldest old*""[Text Word] OR ""senior*""[Text Word] OR ""senium""[Text Word] OR ""very old*""[Text Word] OR ""septuagenarian*""[Text Word] OR ""octagenarian*""[Text Word] OR ""octogenarian*""[Text Word] OR ""nonagenarian*""[Text Word] OR ""centarian*""[Text Word] OR ""centenarian*""[Text Word] OR ""supercentenarian*""[Text Word] OR ""older people""[Text Word] OR ""older subject*""[Text Word] OR ""older patient*""[Text Word] OR ""older age*""[Text Word] OR ""older adult*""[Text Word] OR ""older man""[Text Word] OR ""older men""[Text Word] OR ""older male*""[Text Word] OR ""older woman""[Text Word] OR ""older women""[Text Word] OR ""older female*""[Text Word] OR ""older population*""[Text Word] OR ""older person*""[Text Word])) AND (""nursing homes""[MeSH Terms] OR ""long term care""[MeSH Terms] OR ""residential care""[All Fields] OR ""homes for the aged""[MeSH Terms] OR ""residential facilities""[MeSH Terms] OR ""long-term care institution""[All Fields] OR ""residential aged care""[All Fields] OR ""skilled nursing facilities""[MeSH Terms] OR ""nursing facility""[All Fields] OR ""care worker""[All Fields] OR ""nurses aids""[All Fields] OR ""nursing personnel""[All Fields] OR ""Caregivers""[MeSH Terms] OR ""Nursing""[MeSH Terms] OR ""Nursing""[MeSH Subheading] OR ""Nursing Care""[MeSH Terms] OR ""Nurses""[MeSH Terms] OR ""Nursing Staff""[MeSH Terms] OR ""Nursing Care""[MeSH Terms] OR ""Nurse's Role""[MeSH Terms] OR ""Home Health Aides""[MeSH Terms] OR ""Nursing Assistants""[MeSH Terms] OR ""Licensed Practical Nurses""[MeSH Terms] OR ""Home Care Services""[MeSH Terms] OR ""nurs*""[Title/Abstract] OR ""home care""[Title/Abstract] OR ""home healthcare""[Title/Abstract] OR ""home health care""[Title/Abstract] OR ""care aide*""[Title/Abstract] OR ""home health aide*""[Title/Abstract]) AND (""Oral Health screening tool""[All Fields] OR ""Geriatric Assessment""[MeSH Terms] OR ""assessment tool""[All Fields] OR ""needs assessment""[MeSH Terms] OR ""oral assessment""[All Fields] OR ""assessment scale""[All Fields] OR ""Surveys and Questionnaires""[MeSH Terms] OR ""questionnaire*""[Title/Abstract] OR ""instrument*""[Title/Abstract] OR ""measure*""[Title/Abstract] OR ""survey*""[Title/Abstract]) AND (""instrumentation""[MeSH Subheading] OR ""methods""[MeSH Subheading] OR ""Comparative Study""[Publication Type] OR ""psychometrics""[MeSH Terms] OR ""psychometr*""[Title/Abstract] OR ""clinimetr*""[Text Word] OR ""clinometr*""[Text Word] OR ""outcome assessment""[Title/Abstract] OR ""outcome measure*""[Text Word] OR ""observer variation""[MeSH Terms] OR ""observer variation""[Title/Abstract] OR ""Health Status Indicators""[MeSH Terms] OR ""reproducibility of results""[MeSH Terms] OR ""reproducib*""[Title/Abstract] OR ""discriminant analysis""[MeSH Terms] OR ""reliab*""[Title/Abstract] OR ""unreliab*""[Title/Abstract] OR ""valid*""[Title/Abstract] OR ""coefficient of variation""[Title/Abstract] OR ""coefficient""[Title/Abstract] OR ""homogeneity""[Title/Abstract] OR ""homogeneous""[Title/Abstract] OR ""internal consistency""[Title/Abstract] OR (""cronbach*""[Title/Abstract] AND (""alpha""[Title/Abstract] OR ""alphas""[Title/Abstract])) OR (""item""[Title/Abstract] AND (""correlation*""[Title/Abstract] OR ""selection*""[Title/Abstract] OR ""reduction*""[Title/Abstract])) OR ""agreement""[Text Word] OR ""precision""[Text Word] OR ""imprecision""[Text Word] OR ""precise values""[Text Word] OR ""test-retest""[Title/Abstract] OR (""test""[Title/Abstract] AND ""retest""[Title/Abstract]) OR (""reliab*""[Title/Abstract] AND (""test""[Title/Abstract] OR ""retest""[Title/Abstract])) OR ""stability""[Title/Abstract] OR ""interrater""[Title/Abstract] OR ""inter-rater""[Title/Abstract] OR ""intrarater""[Title/Abstract] OR ""intra-rater""[Title/Abstract] OR ""intertester""[Title/Abstract] OR ""inter-tester""[Title/Abstract] OR ""intratester""[Title/Abstract] OR ""intra-tester""[Title/Abstract] OR ""interobserver""[Title/Abstract] OR ""inter-observer""[Title/Abstract] OR ""intraobserver""[Title/Abstract] OR ""intra-observer""[Title/Abstract] OR ""intertechician""[Title/Abstract] OR ""inter-</p> |  |
|------------------------------------------------------------------------------------------------------------------------------------------------------------------------------------------------------------------------------------------------------------------------------------------------------------------------------------------------------------------------------------------------------------------------------------------------------------------------------------------------------------------------------------------------------------------------------------------------------------------------------------------------------------------------------------------------------------------------------------------------------------------------------------------------------------------------------------------------------------------------------------------------------------------------------------------------------------------------------------------------------------------------------------------------------------------------------------------------------------------------------------------------------------------------------------------------------------------------------------------------------------------------------------------------------------------------------------------------------------------------------------------------------------------------------------------------------------------------------------------------------------------------------------------------------------------------------------------------------------------------------------------------------------------------------------------------------------------------------------------------------------------------------------------------------------------------------------------------------------------------------------------------------------------------------------------------------------------------------------------------------------------------------------------------------------------------------------------------------------------------------------------------------------------------------------------------------------------------------------------------------------------------------------------------------------------------------------------------------------------------------------------------------------------------------------------------------------------------------------------------------------------------------------------------------------------------------------------------------------------------------------------------------------------------------------------------------------------------------------------------------------------------------------------------------------------------------------------------------------------------------------------------------------------------------------------------------------------------------------------------------------------------------------------------------------------------------------------------------------------------------------------------------------------------------------------------------------------------------------------------------------------------------------------------------------------------------------------------------------------------------------------------------------------------------------------------------------------------------------------------------------------------------------------------------------------------------------------------------------------------------------------------------------------------------------------------------------------------------------------------------------------------------------------------------------------------------------------------------------------------------------------------------------------------------------------------------------------------------------------------------------------------------------------------------------------------------------------------------------------------------------------------------------------------------------------------------------------------------------------------------------------------------------------------------------------------|--|

|                                                                                                                                                                                                                                                                                                                                                                                                                                                                                                                                                                                                                                                                                                                                                                                                                                                                                                                                                                                                                                                                                                                                                                                                                                                                                                                                                                                                                                                                                                                                                                                                                                                                                                                                                                                                                                                                                                                                                                                                                                                                                                                                                                                                                                                                                                                                                                                                                                                                                                                                                                                                                                                                                                                                                                                                                                                                                                                                                                                                                                                                                                                                                                                                                                                                                                                                                                                                                                                                                                                                                                                                                                                                                                                                                                                                                                                                                                                                                       |  |
|-------------------------------------------------------------------------------------------------------------------------------------------------------------------------------------------------------------------------------------------------------------------------------------------------------------------------------------------------------------------------------------------------------------------------------------------------------------------------------------------------------------------------------------------------------------------------------------------------------------------------------------------------------------------------------------------------------------------------------------------------------------------------------------------------------------------------------------------------------------------------------------------------------------------------------------------------------------------------------------------------------------------------------------------------------------------------------------------------------------------------------------------------------------------------------------------------------------------------------------------------------------------------------------------------------------------------------------------------------------------------------------------------------------------------------------------------------------------------------------------------------------------------------------------------------------------------------------------------------------------------------------------------------------------------------------------------------------------------------------------------------------------------------------------------------------------------------------------------------------------------------------------------------------------------------------------------------------------------------------------------------------------------------------------------------------------------------------------------------------------------------------------------------------------------------------------------------------------------------------------------------------------------------------------------------------------------------------------------------------------------------------------------------------------------------------------------------------------------------------------------------------------------------------------------------------------------------------------------------------------------------------------------------------------------------------------------------------------------------------------------------------------------------------------------------------------------------------------------------------------------------------------------------------------------------------------------------------------------------------------------------------------------------------------------------------------------------------------------------------------------------------------------------------------------------------------------------------------------------------------------------------------------------------------------------------------------------------------------------------------------------------------------------------------------------------------------------------------------------------------------------------------------------------------------------------------------------------------------------------------------------------------------------------------------------------------------------------------------------------------------------------------------------------------------------------------------------------------------------------------------------------------------------------------------------------------------------|--|
| <p>technician"[Title/Abstract] OR "intra-technician"[Title/Abstract] OR "intra-technician"[Title/Abstract] OR "interexaminer"[Title/Abstract] OR "inter-examiner"[Title/Abstract] OR "intraexaminer"[Title/Abstract] OR "intra-examiner"[Title/Abstract] OR "interassay"[Title/Abstract] OR "inter-assay"[Title/Abstract] OR "intraassay"[Title/Abstract] OR "intra-assay"[Title/Abstract] OR "interindividual"[Title/Abstract] OR "inter-individual"[Title/Abstract] OR "intraindividual"[Title/Abstract] OR "intra-individual"[Title/Abstract] OR "interparticipant"[Title/Abstract] OR "inter-participant"[Title/Abstract] OR "intraparticipant"[Title/Abstract] OR "intra-participant"[Title/Abstract] OR "kappa"[Title/Abstract] OR "kappa's"[Title/Abstract] OR "kappas"[Title/Abstract] OR "repeatab*"[Text Word] OR ("replicab*"[Text Word] OR "repeated"[Text Word]) AND ("measure"[Text Word] OR "measures"[Text Word] OR "findings"[Text Word] OR "result"[Text Word] OR "results"[Text Word] OR "test"[Text Word] OR "tests"[Text Word]) OR "generaliza*"[Title/Abstract] OR "generalisa*"[Title/Abstract] OR "concordance"[Title/Abstract] OR ("intraclass"[Title/Abstract] AND "correlation*"[Title/Abstract]) OR "discriminative"[Title/Abstract] OR "known group"[Title/Abstract] OR "factor analysis"[Title/Abstract] OR "factor analyses"[Title/Abstract] OR "factor structure"[Title/Abstract] OR "factor structures"[Title/Abstract] OR "dimension*"[Title/Abstract] OR "subscale*"[Title/Abstract] OR ("multitrait"[Title/Abstract] AND "scaling"[Title/Abstract] AND ("analysis"[Title/Abstract] OR "analyses"[Title/Abstract])) OR "item discriminant"[Title/Abstract] OR "interscale correlation*"[Title/Abstract] OR "error"[Title/Abstract] OR "errors"[Title/Abstract] OR "individual variability"[Title/Abstract] OR "interval variability"[Title/Abstract] OR "rate variability"[Title/Abstract] OR ("variability"[Title/Abstract] AND ("analysis"[Title/Abstract] OR "values"[Title/Abstract])) OR ("uncertainty"[Title/Abstract] AND ("measurement"[Title/Abstract] OR "measuring"[Title/Abstract])) OR "standard error of measurement"[Title/Abstract] OR "sensitiv*"[Title/Abstract] OR "responsive*"[Title/Abstract] OR ("limit"[Title/Abstract] AND "detection"[Title/Abstract]) OR "minimal detectable concentration"[Title/Abstract] OR "interpretab*"[Title/Abstract] OR ("minimal"[Title/Abstract] OR "minimally"[Title/Abstract] OR "clinical"[Title/Abstract] OR "clinically"[Title/Abstract] AND ("important"[Title/Abstract] OR "significant"[Title/Abstract] OR "detectable"[Title/Abstract]) AND ("change"[Title/Abstract] OR "difference"[Title/Abstract])) OR ("small*"[Title/Abstract] AND ("real"[Title/Abstract] OR "detectable"[Title/Abstract]) AND ("change"[Title/Abstract] OR "difference"[Title/Abstract])) OR "meaningful change"[Title/Abstract] OR "ceiling effect"[Title/Abstract] OR "floor effect"[Title/Abstract] OR "Item response model"[Title/Abstract] OR "IRT"[Title/Abstract] OR "Rasch"[Title/Abstract] OR "Differential item functioning"[Title/Abstract] OR "DIF"[Title/Abstract] OR "computer adaptive testing"[Title/Abstract] OR "item bank"[Title/Abstract] OR "cross-cultural equivalence"[Title/Abstract]) NOT ("biography"[Publication Type] OR "case reports"[Publication Type] OR "comment"[Publication Type] OR "directory"[Publication Type] OR "editorial"[Publication Type] OR "festschrift"[Publication Type] OR "interview"[Publication Type] OR "legislation"[Publication Type] OR "letter"[Publication Type] OR "news"[Publication Type] OR "newspaper article"[Publication Type] OR "patient education handout"[Publication Type] OR "consensus development conference"[Publication Type] OR "consensus development conference, nih"[Publication Type] OR "practice guideline"[Publication Type]) NOT ("animals"[MeSH Terms] NOT "humans"[MeSH Terms])"</p> |  |
|-------------------------------------------------------------------------------------------------------------------------------------------------------------------------------------------------------------------------------------------------------------------------------------------------------------------------------------------------------------------------------------------------------------------------------------------------------------------------------------------------------------------------------------------------------------------------------------------------------------------------------------------------------------------------------------------------------------------------------------------------------------------------------------------------------------------------------------------------------------------------------------------------------------------------------------------------------------------------------------------------------------------------------------------------------------------------------------------------------------------------------------------------------------------------------------------------------------------------------------------------------------------------------------------------------------------------------------------------------------------------------------------------------------------------------------------------------------------------------------------------------------------------------------------------------------------------------------------------------------------------------------------------------------------------------------------------------------------------------------------------------------------------------------------------------------------------------------------------------------------------------------------------------------------------------------------------------------------------------------------------------------------------------------------------------------------------------------------------------------------------------------------------------------------------------------------------------------------------------------------------------------------------------------------------------------------------------------------------------------------------------------------------------------------------------------------------------------------------------------------------------------------------------------------------------------------------------------------------------------------------------------------------------------------------------------------------------------------------------------------------------------------------------------------------------------------------------------------------------------------------------------------------------------------------------------------------------------------------------------------------------------------------------------------------------------------------------------------------------------------------------------------------------------------------------------------------------------------------------------------------------------------------------------------------------------------------------------------------------------------------------------------------------------------------------------------------------------------------------------------------------------------------------------------------------------------------------------------------------------------------------------------------------------------------------------------------------------------------------------------------------------------------------------------------------------------------------------------------------------------------------------------------------------------------------------------------------|--|
